# Supplementary material for: Primary molt in Gruiforms and simpler molt summary tables
Source: PeerJ. 2018 Sep 7;6:e5499. doi: 10.7717/peerj.5499 (PMC6130233; doi:10.7717/peerj.5499)
Supplement: Supplemental Information 2 [file peerj-06-5499-s002.xlsx]

## Sheet: Trumpeters
AMNH #	date	local	sex	age	P10		P9		P8		P7		P6		P5		P4		P3		P2		P1		# waves P10-4	# arrests P10-P4	# waves P3-1	notes
471824	22_Jun_1885	no locality	?	AD	1		0.99		1		0.5	p	0		0		0.4		0		0		0		3		0
					n		t		n								n
125282	5_Aug_1913	no locality	m	AD	0.7	NA	cut	NA	1		1		1		1		1		1		1		1		1		0	P9 cut on both wings
					n
283171	19_Dec_1930	no locality	m	AD	1		1		1		1		1		1		1		1		1		1		0	0	0
283170	12_Dec_1930	no locality	m	AD	1		1		1		1		1		0		0		0		0		0		0	1	0	No juvenile primaries
283173	23_Dec_1930	no locality	f	AD	1		1		1		1		1		1		1		1		1		1		0	0	0
283172	19_Dec_1930	no locality	f	AD	1	pp	0.2	p	0		0		0		0		0		0		0		0		1		0	No juvenile primaries
					n
471816	Apr_1900	Venezuela	m	AD	0		0.3		0		0		0		0		0		0.3	p	0		0		1		1
							n												n
431787	25_Mar_1929	Venezuela	f	AD	0/1		0/1		0/1		0/1		0/1		0/1		0/1		0/1		0/1		0/1		0	0	0
431786	25_Mar_1929	no locality	m	AD	0/1		0/1		0/1		0/1		0/1		0/1		0/1		0/1		0/1		0/1		0	0	0
471926	8_Oct_1902	French Guiana	f	AD	1		1		1		1		1		1		1		1		1		1		0	0	0
176806	2_Feb_1923	French Guiana	m	AD	1	pp	0_0		0_0		0		0		0		0		0		0		0		0	1	0
					n
176805	27_Jan_1923	Guyana (British Guiana on AMNH tags)	m	AD	0		0		0		0		0		0		0		0		0		0		0	0	0	No juvenile primaries
120339	Mar_1913	Venezuela	?	AD	1		1		1		1	p	0.9	p	0		0		0		0		0		1		0	No juvenile primaries
120340	Mar_1913	Venezuela	?	AD	1		0		1		1		1		0.99		1		1		1		1		1		0
															t
120338	18_Mar_1913	Venezuela	m	AD	1		1		1		1		1	p	0.15	d	0		0		0		1		1		0
125284	3_Jul_1913	Guyana (British Guiana on AMNH tags)	m	AD	1		1		0.6		1		1		1		1		1		1		1		1		0
									t
125280	9_Aug_1913	Guyana (British Guiana on AMNH tags)	m	AD	cut	NA	0.8	p	0		0		0		0		0		0		0.2		0		1		1
							NA														n
471825	20_Apr_1905	Suriname	f	AD	0		0		0		0	d	0.3		0.5		0		0		0		0		2		0
															n
75414	10_Feb_1900	Venezuela	m	AD	1		1		1		1		1		1		1		1		1		1		0	0	0
471827	8_Oct_1902	French Guiana	f	AD	1		1		1		1		1		1		1		1		1		1		0	0	0
125283	23_jul_1913	Guyana (British Guiana on AMNH tags)	?	AD	1		1		1		1		1	p	0.95	p	0.5	p	0		0		0		1		0	No juvenile primaries
272286	19_Nov_1928	no locality	f	AD	1		1		1		1		1		1		1		1		1		1		0	0	0
804826	27_Apr_1922	Guyana (British Guiana on AMNH tags)	m	AD	1		1		1	p	0.8	p	0		0		0		0		0		0		1		0	No juvenile primaries
804827	7_Aug_1920	Guyana (British Guiana on AMNH tags)	f	AD	1		1	p	0.05	p	0		0		0		0		0		0		0.4		1		1	RS1=Old; no juvenile feathers
																							n
125279	1_Aug_1913	Guyana (British Guiana on AMNH tags)	m	AD	cut	NA	0.8		0		0		0		0		0		0		0.9		0		1		1
																					n
272289	9_Nov_1928	Venezuela	m	AD	1		1		1		1		1		1		1		1		1		1		0	0	0
804824	no date	no locality	?	AD	1		1		1		1		0.5		1		1		1		1		1		1		0
													t
434047	6_June_1929	Brazil	m	AD	0/1		0/1		0/1		0/1		0/1		0/1		0/1		0/1		0/1		0/1		0		0
804822	no date	no locality	?	AD	1		1		1		1		1		1	p	0.9	p	0		0		0		1		0
283174	26_Dec_1930	Brazil	f	AD	0.3	d	1		1		1		1		1		1		1		1		0.5		1		1	S1=0.5; 1s in primaries could be old but show little wear; new is our best guess for these primaries
					t																		t
310155	1929 (can't read month or day)	Brazil	f	AD	0.9	pp	0		0		1	p	0.99	p	0		0		0		0		0.4		2		1	RS1 broken at tip, not growing
					n																		n
431788	11_May_1921	Venezuela	m	AD	1	pp	0.6		0		0		0		0		0		0.7	p	0		0		1		1	Old feathers just slightly browner; very subtile; RS1=.5, S2=0
					n														n
283175	19_Dec_1920	Brazil	m	AD	1		1		1		1		1		1		1		1		1		1		0	0	0
431789	11_May_1929	Venezuela	f	AD	0.6	d	1		1		1		1		0.4		1		1		1		0.8		2		1
					t										t								t
471818	4_Apr_1900	no locality	f	AD	1		1	p	0.9	p	0		0		0		0		0.01	p	0		0		1		1	P3 is an empty socket
																			n
310153	17_Aug_1929	no locality	m	AD	1		1	p	0.3	p	0		0		0		0		0		0		0		1		0	No juvenile primaries
311639	20_Oct_1929	Brazil	m	AD	0		0		0		0		0		0		0		0		0		0		0	0	0
311636	19_Dec_1929	Brazil	m	AD	1	pp	0.9	p	0		0		0.8		0		0		0		0		0		2		0
					n								n
311638	18_Oct_1929	Brazil	f	AD	0		0		0		0		0		0		0		0		0		0		0	0	0
272293	9_Nov_1928	Venezuela	m	AD	1		1		1		1		1		1		1		1		1		1		0	0	0
272295	no date	no locality	?	AD	0/1		0/1		0/1		0/1		0/1		0/1		0/1		0/1		0/1		0/1		0	0	0
272288	19_Nov_1928	Venezuela	f	AD	1		1		1		1		1		1		1		1		1		1		0	0	0
272292	19_Nov_1928	Venezuela	m	AD	1		1		1		1		1		1		1		1		1		1		0	0	0
272294	19_Nov_1928	Venezuela	m	AD	1		1		1		1		1		1		1		1		1		1		0	0	0
272287	9_Nov_1928	Venezuela	f	AD	1		1		1		1		1		1		1		1		1		1		0	0	0
272291	7_Nov_1928	Venezuela	m	AD	1		1		1		1		1		1		0.99		1	p	0.85		1		1		1
																	t		n		t
310156	28_Aug_1929	Brazil	f	AD	0		1		0		0		1	p	0.9	p	0		0		0		0		1		0
323196	12_Mar_1938	Venezuela	f	AD	1		1		1		1		1		1		1		1		1		1		0	0	0
816605	7_Apr_1984	Venezuela	?	AD	0		0		0		0		0		0		0		0.2		0		0		0	0	1
																			n	p
471821	no date	no locality	?	AD	1		1		1		0		0		1		1		1		0		1		0	1	0
125281	5_Aug_1913	Guyana (British Guiana on AMNH tags)	m	AD	cut		0/1		0.9		0/1		0		0		0		0.9	p	0		0		1		1	Ages of distal primaries difficult to assess
									n										n
471823	11_Feb_1887	Guyana (British Guiana on AMNH tags)	f	AD	1		1	p	0.99	p	0		0		1		1		1		1		0.95		1		1
																							t
471822	Mar_1888	Guyana (British Guiana on AMNH tags)	m	AD	0.5	d	1		0		0		0		0		0		0		0		1		1		0	P8 to P1 gradation from old to new
					t
323195	9_Mar_1938	Venezuela	m	AD	1		1		1		1		1		1		1		1		1		1		1		1
471817	20_Apr_1899	Venezuela	m	AD	0/1		0/1		0/1		0/1		0/1		0/1		0/1		0/1		0/1		0/1		0	0	0
471820	Mar_1898	no locality	?	AD	1		1		1		1		1		1		0		0		0		1		0	1	0	P4-P2 are wide; not juvenile feathers; P1 is unambigously new
																							n
460075	23_Feb_1942	Colombia	m	AD	0		0		0		0		0		1		0.01		1		1		1		1		0
																	t
460076	23_Feb_1942	Colombia	f	AD	1	pp	0.9	p	0.1	p	0		0		0		0		0		0		0		1		0	No juvenile primaries
					n
178923	26_Mar_1923	Ecuador	m	AD	0		1	p	0.9	p	0		0		0		0		0		0.3		0		1		1
																					n
115713	20_July_1912	Colombia	f	AD	1		1		1	p	0.99	p	0.7	p	0		0		0		0		0.01		1		1	No juvenile primaries
																							n
178920	4_Mar_1923	Ecuador	f	AD	1		1		1		1		1		1		1		1		1		1		0	0	0
254779	18_Oct	Ecuador	f	AD	1		0		0		0		0		0		0		0.9	p	0		0		0	1	1
																			n
257106	23_Jan_1926	Ecuador	f	AD	1		1		0		0		0		0		0		1	p	0		1		0	1	0
																			n				n
178921	4_Mar_1923	Ecuador	f	AD	1		0.1	p	0		0		0		0		0		0.01	p	0		1		1		1	P8 older, P4 newer
					n														n				n
178925	30_Mar_1923	Ecuador	f	AD	1		1		1		1		1		0.4		1		1		1		1		1		0
															t
35581	no date	Ecuador	?	AD	1		1		1		1		1		1		1		1		1		1		0	0	0
447319	no date	no locality	m	AD	0		0		0		0		0		0		0		0		0		0		0	0	0
230689	5_Jul_1926	Ecuador	m	AD	0		0.2		0		0		0		0		0		0		0		0		1		0	P8 to P1 gradation to P1 being newer, but not new
							n
254777	2_Nov_1925	Ecuador	m	AD	1		0		0		0		0/1		0/1		0		0		0		0		0	1	0	P9 to P5 gradation to P5 being newer; clear break between P5 and P4 with P4 older
					n
35580	no date	Ecuador	?	AD	0		0		0		0		0		0		0		0		0		0		0	0	0
254778	2_Nov_1925	Ecuador	f	AD	1		1		0		0		0		0		0		0/1		1		0		0	1	0	P8 to P3 gradation to P3 being newer
																					t
257107	18_Jan_1926	Ecuador	m	AD	1		0		0		0		0		0		0		0		0		0		0	1	0
254782	1_Jul_1925	Ecuador	f	AD	0.99	pp	0		0		1	p	0.99	p	0		0		0		0		0		2		0	P5 to P1 gradation to P1 being newer
					n
254780	19_Oct_1925	Ecuador	f	AD	1		0.95	p	0		0		0.8		0		0		0		0		0		2		0
					n								n
				ADULTS above; IMMATURES below
AMNH #	date	local	sex	age	P10		P9		P8		P7		P6		P5		P4		P3		P2		P1		# waves P10-4	# arrests P10-P4	# waves P3-1	notes
254781	23_Oct_1925	Ecuador	m	IMM	1		1		1		1		1		1		j		j		j		j		0juv		0juv	j = narrow and thinner feather shape
178924	29_Mar_1923	Ecuador	m	IMM	j		j		j		j		j		j		j		j		j		1		0juv		0juv
125285	20_Aug_1913	Guyana (British Guiana on AMNH tags)	f	IMM	0.5	pp	0		0		0		0		0		0		0.5	p	0/j		0/j		1juv		1juv	P9-P4 gradation from older to newer; P1-P2 narrow, short, thin and destroyed like juvenile feathers
					n														n
431790	11_May_1929	Venezula	f	IMM	1		1		1		1		1	p	0.99	p	0.5		j		j		j		1juv		0juv
471819	March_1898	no locality	?	IMM	1		1		1		1		1		1		1		1		0/j		0/j		0juv		0juv	LS1 = 0 or juvenile, LS2 = 1. These presumed juvenile feathers were frayed and narrower than the new feathers. RS1-2=j, RS3=1 (new).
804825	no date	Guyana (British Guiana on AMNH tags)	m	IMM	1		0.5		1		1		1		1		1		1		0.7	p	j		1j		1j	LP8-3, gradation from older to new with LP3 being newest. Rechecked to confirms P1=juvenile
							t

## Sheet: Limpkins
museum #	date	local	age	sex	P10		P9		P8		P7		P6		P5		P4		P3		P2		P1		notes
AMNH 281242	4_Jul_1930	Brazil	AD	m	1		1 worn		0		0		0		0		1 worn		0		0		1
AMNH 275525	29_Oct_1930	Brazil	AD	f	0.89	pp	0.7		1		0.95	p	0.7	p	0		0		0		0		0
					n		t		n
AMNH 283166	8_Dec_1930	Brazil	AD	m	0.93	pp	0		1		0.9	p	0.6	p	0		0		0		0		0
					n		t		n
AMNH 281243	9_Jul_1930	Brazil	AD	m	1		1		1		1		1		1		1		1		1		1
AMNH 471796	3_Jan_1924	Dominican Republic	AD	f	0.6	pp	0.01	p	0		0.65	p	0		0		0		0		0		0
					n				t		n
AMNH 45704	Mar_1883	Florida	AD	m	0		0		0		0		0		0		0		0		0		0
AMNH 45705	No date	Florida	AD	m	0/1		0/1		0/1		0/1		0/1		0/1		0/1		0/1		0/1		0/1
AMNH 73581	4_May_1900	Florida	AD	m	0		0		0		0		0		0		0		0		0		0
AMNH 79775	29_May_1889	Texas	AD	m	0		0		0		0		0		0		0		0		2		0
AMNH 79776	22_Aug_1876	Florida	AD	f	1		1		1		1		1	p	0.86	p	0		0		0		m
AMNH 79777	22_Aug_1878	Florida	AD	m	1		1		1	p	0.11		0		1		1		1	p	0.17	p	0
AMNH 113645	Aug_1879	Florida	AD	m?	1		1		1		1		0		0		0		0		0		0
AMNH 149353	4_Sept_1916	Paraguay	AD	f?	1		1		1		1		1		1		1		1		1		1
AMNH 182394	3_Mar_1924	Argentina	AD	m	0		0		0		0		0		1		0		0		0		0
AMNH 281239	9_Jun_1930	Brazil	AD	m	1	pp	0.79	p	0		0		0		0		0		0		0		0
					n
AMNH 281240	20_Jun_1930	Brazil	AD	m	1		1		1		0		1		0		1		0		0		1
AMNH 300599	31_Dec_1935	Florida	AD	?	1		1		1		0		0		0		1		0		0		0
AMNH 354233	Jul_1913	Ecuador	AD	m	1		1		1		1		1	p	0.85	p	0		0		0		0
AMNH 442390	2_Dec_1908	Florida	AD	?	1		1		1		1		0		1		1	p	0.29	p	0		0
AMNH 445163	15_Feb_1917	Dominican Republic	AD	f?	1		1		1		1		1		1		1		1		1		1
AMNH 471793	12_Aug_1906	Jamaica	AD	f	1	pp	0.99	p	0		0		0		0		0		0		0		0
					n
AMNH 471797	30_Mar_1922	Dominican Republic	AD	f	1		1		1		1		1		1		1	p	0.95	p	0		0
AMNH 471798	31_Mar_1893	Costa Rica	AD	m	1		1		1		1		1		1		1		0		0		1
AMNH 471800	11_Jan_1906 or 1_Nov_1906	Surinam	AD	m	1		1		1		1		1		1		1		1		1		1
AMNH 471803	21_Apr_1905	Surinam	AD	m	1		1		1		1		1		1		1		1		1		1
AMNH 471804	26_Nov_1905	Surinam	AD	f	1	pp	0.99	p	0.95	p	0		1		1		1		0		0		ND
					n
AMNH 471810	Sep_1893	Paraguay	AD	m	1		1		1		0		1		1		1		1		1		1
AMNH 751448	2_Mar_1913	Florida	AD	m	1		1		1		0		0		0		1		1		1		1
AMNH 751450	28_Feb_1913	Florida	AD	m	1		1		1		0		0		0		0		0		0		0
AMNH 769184	21_Mar_1958	Argentina	AD	m	1		0.95		1		1		1	p	0.95	p	0.3	p	0		0		0/1
					n		t
AMNH 792477	6_Oct_1961	Argentina	AD	f	1		1		1		0		0		1		1		1		1		1
AMNH 824353	19_Jun_1957	Florida	AD	f	1		1		1		1		1		1		0		0		0		0
AMNH 123909	12_Apr_1913	Ecuador	AD	f	1		1		1		0		0		0		0		0		0		0
AMNH 140404	24_Jan_1916	Argentina	AD	?	1		1		1		0		0		0		0		0		0		0
AMNH 230698	07_Sep_1926	Peru	AD	m	1		1		1		1		1		1		0.1		1		1		1
																	t
AMNH 278524	25_Oct_1930	Brazil	AD	f	0.29	pp	0.15	p	0		0		0		0/1		0/1		0/1		0.2		0/1
					n																n
AMNH 278525	07_Sep_1926	Brazil	AD	f	0.9	pp	0.7		1		0.98	p	0.7	p	0		0		0		0		0
					n		t		n
AMNH 283168	8_Dec_1930	Brazil	AD	f	0.92	pp	0		0.79	p	0.19	p	0		0		0		0		0		0
					n		t		n
AMNH 313388	19_Feb_1914	Suriname	AD	f	1		1		1	p	0.38	p	0		0		0		0		0		0
AMNH 321533	27_Aug_1931	Brazil	AD	f	1		1		1		1		1		0		1		0.9		1		1
																			t
AMNH 471801	27_Sep_1901	Suriname	AD	f	1		1		0		1		1		1		0		0		0		0
									t
AMNH 471802	1_Mar_1905	Suriname	AD	?	1		1	p	0.6	p	0		1		1		1		1		0.99		1
																					t
AMNH 471808	Mar_1894	Venezuela	AD	?	0.95	pp	0.9		0		0		0.95		0		0		0		0		0
					n								n
AMNH 471811	1_Jan_1894	Argentina	AD	m	0/1		0/1		0/1		0/1		0/1		0/1		0.7		0		0		0
																	a
AMNH 471814	13_Dec_1900	Argentina	AD	f	1		1		1		1	p	0.01	p	0		0		0		0		0
AMNH 792476	1_May_1962	Argentina	AD	m	1		1		1		1	p	0.95	p	0		0		0		0		0
AMNH 803146	13_Feb_1970	Paraguay	AD	f	1		1		1		0		1	p	0.6	p	0		0		0		0
													n
AMNH 751451	26_Feb_1913	Florida	AD	m	1		1		0		0		0		0		0		0		0		0
CUMV 30674	6_Feb_1965	Mexico	AD	f	0.05		0.05		0		0		0		0.5		0.3		1		1		0.171429
					a		a								n		t						n
CUMV 36675	6_Feb_1965	Mexico	AD	m	1		1		1		1	p	0.96	p	0		0		0		0		0
UWBM 36822	22_Feb_1886	Florida	AD	f	0		0		0		0		0		0		0		0		0		0
UWBM 37719	16_Nov_1983	Mexico	AD	m	0		0		0		0		0		0		0		1		1		1
UWBM 48669	28_Aug_1984	Florida	AD	m	0.01		0		0		0		0		0		0		0		0		m
					n
UWBM 93239	20_Jan_2001	Honduras	AD	m	1		1	p	0.99	p	0		0		1		0		0		1		1
UWBM 96321	23_Mar_1928	Florida	AD	f	0		0		0		0		0		0		0		0		0		0
NMNH 15285	No date	Argentina	AD	?	0/1		0/1		0/1		0/1		0/1		0/1		0/1		0/1		0/1		0/1
NMNH 16916	No date	Colombia	AD	?	0		0		0		0		0		1		0		1		1		1
NMNH 270509	21_Feb_1919	Florida	AD	m	1		1		0		1		1		1		0		0		1		1
NMNH 326580	13_Feb_1931	Venezuela	AD	m	1		1		1		1		1		0.95		1		0.95		1		1
															t				t
NMNH 326581	14_Feb_1931	Venezuela	AD	f	1		1		1		1		0.95		1		1		1		1		1
													t
NMNH 356699	No date	Belize	AD	m	0/1		0/1		0/1		0/1		0/1		0/1		0/1		0/1		0/1		0/1
NMNH 359578	3_May_1940	Mexico	AD	f	1		1		1		1	p	0.99	p	0.01	p	0		0		0		0		gradient in wear from P10 to 7, with 7 freshest
NMNH 372455	3_Aug_1942	Colombia	AD	m	1		1		1		0.7		1		1		1		0.1		1		1
											t
NMNH 372456	3_Aug_1942	Colombia	AD	f	1		1		0.3		1		1		0.8		1		1		1		1
									t						t
NMNH 384579	1_July_1945	Colombia	AD	m	1		1		1		1		1		1		1		1		1		1
NMNH 390701	Jan_1939	Lable not legible	AD	m	1		1		1		1		1		1		1		1		1		m
NMNH 391923	22_Dec_1946	Colombia	AD	f	1		1		1		0.9		1		1		1		1		1		1		all primaries and secondaries are the same age
											t
NMNH 401254	29_March_1948	Colombia	AD	m	1		1		1		1		1		1		1		1		1		1		all primaries are the same age
NMNH 406435	10_July_1948	Venezuela	AD	?	1		1		1		1		1		1		1		1		1		1		all primaries and secondaries are the same age
NMNH 469795	28_Jan_1959	Panama	AD	m	0.15		0.15		0.8		0.01		0		0		0		0		0		m
					a		a		n
NMNH 469796	18_Feb_1959	Panama	AD	f	0/1		0/1		0/1		0/1		0/1		0/1		0/1		0/1		0/1		0/1
NMNH 472077	15_April_1959	Panama	AD	f	1		1		1		1		1		1 worn		1		1		1		1		p5 more worn than p6, but looks new, progression of wear from p10 to p6, p6 newest
NMNH 53082	Dec_1867	Argentina	AD	f	0.05		1		0.95	p	0.05	p	0		0		0		0		0		0
							n
NMNH 57891	11_Feb_1869	Mexico	AD	m	1		1		1		1		1		1		1		0		0		0
NMNH 635719	23_Oct_2005	Uruguay	AD	m	1		1		0.99		1		1	p	0.15	p	0		0		0		0
									t
NMNH 88257	No date	Florida	AD	?	1		1		0.95		1		1		1		1	p	0.99	p	0.7	p	0.2
Adults above Immatures below
museum #	date	local	age	sex	P10		P9		P8		P7		P6		P5		P4		P3		P2		P1		Notes
AMNH 321774	23_Dec_1931	Brazil	IMM	f	1		1		J		J		J		J		J		J		J		J
AMNH 25761	No date	Florida	IMM	?	J		J		J		J		J		J		J		J		J		J
AMNH 74543	2001-01-15	Mexico	IMM	m	J		J		J		J		J		J		J		J		J		J
AMNH 74544	2001-01-17	Mexico	IMM	?	J		J		J		J		J		J		J		J		J		J
AMNH 74545	2001-01-17	Mexico	IMM	m	J		J		J		J		J		J		J		J		J		J
AMNH 74547	2001-01-19	Mexico	IMM	f	J		J		J		J		J		J		J		J		J		J
AMNH 74549	2001-02-01	Mexico	IMM	f	J		J		J		J		J		J		J		J		J		J
AMNH 123910	2013-04-12	Ecuado	IMM	?	J		J		J		J		J		J		J		J		J		J
AMNH 140401	Jan_1916	Argentina	IMM	?	1		1	p	0.3	p	J		J		J		J		J		J		J
AMNH 140402	21_Jan_1916	Argentina	IMM	f	1		1		J		J		J		J		J		J		J		J
AMNH 143720	20_May_1917	Nicaragua	IMM	m?	0.86	pp	0.64	p	J		J		J		J		J		J		J		J
					n
AMNH 168727	2022-04-08	Florida	IMM	?	J		J		J		J		J		J		J		J		J		J
AMNH 237562	2027-06-09	Peru	IMM	f	J		J		J		J		J		J		J		J		J		J
AMNH 237563	11_Jun_1927	Peru	IMM	f	J		J		J		J		J		J		J		J		J		J
AMNH 237564	3_Jun_1927	Peru	IMM	m	J		J		J		J		J		J		J		J		J		J
AMNH 241384	10_Dec_1926	Brazil	IMM	?	J		J		J		J		J		J		J		J		J		J
AMNH 269774	2007-05-29	Venezuela	IMM	?	J		J		J		J		J		J		J		J		J		J
AMNH 354228	2007-04-12	Florida	IMM	?	J		J		J		J		J		J		J		J		J		J
AMNH 354229	7_May_1887	Florida	IMM	m	J		J		J		J		J		J		J		J		J		J
AMNH 354230	15_Apr_1907	Florida	IMM	m	J		J		J		J		J		J		J		J		J		J
AMNH 354231	16_Apr_1907	Florida	IMM	f	J		J		J		J		J		J		J		J		J		J
AMNH 354232	16_Apr_1907	Florida	IMM	f	J		J		J		J		J		J		J		J		J		J
AMNH 389122	10_Feb_1922	Costa Rica	IMM	m	J		J		J		J		J		J		J		J		J		J
AMNH 406834	14_Dec_1928	No locality	IMM	f	J		J		J		J		J		J		J		J		J		J
AMNH 471791	15_Dec_1906	Jamaica	IMM	m	1		1		0		1	p	0.4	p	0		0		0		0		0
									t		n
AMNH 471792	Jan_1907	Jamacia	IMM	?	1/J		1/J		1/J		1/J		1/J		1/J		1/J		1/J		1/J		1/J
AMNH 471799	9_Jun_1897	Mexico	IMM	f	1		1		1		J		J		J		J		J		J		J
AMNH 471806	13_Jan_1898	Venezuela	IMM	f	1		J		J		J		J		J		J		J		J		J
AMNH 471809	No date	No locality	IMM	?	1		1		1	p	0.65	p	J		J		J		J		J		J
AMNH 471812	29_Jan_1897	Argentina	IMM	f	1		1		1	p	0.5	p	J		J		J		J		J		J
AMNH 471813	25_May_1901	Argentina	IMM	m	1		J		J		J		J		J		J		J		J		J
AMNH 471815	No date	Brazil	IMM	?	J		J		J		J		J		J		J		J		J		J
AMNH 751449	2_Mar_1913	Florida	IMM	f	1		1		1		1		1		1		1		J		J		J
AMNH 778901	31_Mar_1961	Argentina	IMM	f	J		J		J		J		J		J		J		J		J		J
AMNH 778902	7_Apr_1961	Argentina	IMM	f	J		J		J		J		J		J		J		J		J		J
AMNH 140403	21_Jan_1916	Argentina	IMM	f	1		1	p	0.65	p	J		J		J		J		J		J		J
AMNH 281241	4_Jun_1920	Brazil	IMM	m	0.86	pp	0.79	p	J		J		J		J		J		J		J		J
					n
AMNH 283167	2_Dec_1930	Brazil	IMM	f	0.95	pp	0.48		0		0.3		0		0		0		0		0		0
					n				t		n
AMNH 471805	No date	British Guiana	IMM	?	0.75		0.84		J		J		J		J		J		J		J		J
						d	n
AMNH 471807	Mar_1894	Venezuela	IMM	?	0.74		0.62		J		J		J		J		J		J		J		J
					n	pp		p
AMNH 278522	29_Oct_1930	Brazil	IMM	m	1		1		1		1		1		1		1		1		1		1
AMNH 278521	24_Oct_1930	Brazil	IMM	m	0.99		0.95	p	0.55	p	0.01	p	J		J		J		J		J		J
					a		a
AMNH 278523	24_Oct_1930	Brazil	IMM	f	1		1		1		1		1		1		1	p	0.05	p	J		J
AMNH 320755	16_Mar?_1931	Paraguay	IMM	m	0/J		0/J		0/J		0/J		0/J		0/J		0/J		0/J		0/J		0/J
CUMV 30284	30_Jan_1896	Florida	IMM	m	J		J		J		J		J		J		J		J		J		J
CUMV 3267	17_April_1924	Florida	IMM	m	0.3		J		J		J		J		J		J		J		J		J
					n
NMNH 176853	1901	Florida	IMM	f	0.7		J		J		J		J		J		J		J		J		J
					n
NMNH 24104	No date	Brazil	IMM	?	1		1		1		1		J		J		J		J		J		J

## Sheet: Flufftails
museum #	species	locality	date	P10		P9		P8		P7		P6		P5		P4		P3		P2		P1	notes
AMNH 157241	Sarothrura pulchra	N Ituri	15_May_1910	g 1/2	pp	g bud	?	pres		pres		pres		pres		pres		pres		pres		pres
				n
AMNH 207831	Sarothrura pulchra	Kenya	24_Feb	1		g 1.5cm		pres		pres		pres		g 2cm		pres		pres		pres		pres
						n								n/t?
AMNH 546274	Sarothrura pulchra	Kenya	23_Jan_1914	1	pp	still g	dd	very beautiful		very beautiful		very beautiful		very beautiful		very beautiful		very beautiful		g 3/4		very beautiful
				n		t														t
AMNH 546274	Sarothrura pulchra	Kenya	23_Jan_1914	pres		pres		g 3/4		beautiful		beautiful		beautiful		beautiful		beautiful		beautiful		beautiful
								n/t?
AMNH 546265	Sarothrura pulchra	Uganda	5_Jun_1919	g bud	pp	seems old		very beautiful		very beautiful		very beautiful		very beautiful		very beautiful	p	g 2cm	?	pres		pres
				n		t
Berlin 25.1782	Sarothrura insularis	Foret Sianaka	May_1925	1		1	p	still g	p	0		0		0		0		0		0		0	P10 &P 9 clearly new
	Note from Stresemanns: Replacement of Ps is likley irregularily ascendent, sometimes with P2 growing two separated places.
AMNH 157216	Canirallus oculaus	Congo	9_Dec_1913	g 4/5	?	g 4/5	p	g pin	?	pres		pres		pres		g 3/4		pres		pres		pres	If P9 is longer than P10, then this gives proximal direction
																n/t?
Field 623	Canirallus oculaus	Cameroon	8_Jan_1913	1		1		1	p	still g	p	g 3/4	p	g pin	p	likely 0		likely 0		likely 0		likely 0
Brit 91.8.1.78	Canirallus oculaus	Gold Coast	No date	1		1		1		1		1		1	p	still g	p	g 5/6	p	0		0

## Sheet: Rails
museum #	species	locality	date	R or L Wing	P10		P9		P8		P7		P6		P5		P4		P3		P2		P1	notes
AMNH 296642	Himantornis haematopus	Congo	16_Nov_1930	L&R	1	pp	g 2/3	p	g 2.5cm	p	0		0		0		0		0		0		0	old and new are easily distinguished in this species
					n
AMNH 157202	Himantornis haematopus	No locality	No date		1		1		1	p	g 1cm pin	p	0		0		0		0		0		0
AMNH 408918	Himantornis haematopus	Tanganyika	16_Aug_1929		1		1		1		1		1		1	p	g 1/2	p	0		0		0
AMNH 545703	Himantornis haematopus	Nigeria	23_Jul_1902	L	1		1		1		1		1		1		1		1	p	g 1/4	pp	0
																							t
AMNH 545706	Himantornis haematopus	Gabon or Congo, Ogooué River	8_Feb_1908	L	1		1		1		1		1		1		1		1		1	pp	g 2cm
																							t
AMNH 545706	Himantornis haematopus	Gabon or Congo, Ogooué River	8_Feb_1908	R	1		1		1		1		1		1		1		1		1		1
AMNH 329018	Nesoclopeus woodfordi	Solomon Islands, Isabel	31_Aug_1927	R									g 4/5	?	g 4/5	p	m?							P4 probably missing, blanks = no data listed
AMNH 329018	Nesoclopeus woodfordi	Solomon Islands, Isabel	31_Aug_1927	L	Pres		Pres		Pres		Pres		Pres		Pres		Pres		Pres		Pres		pres	no molt
AMNH 545675	Megacrex inepta	New Guinea, Setekawa River	7_Nov_1912	L	0?		0?		0?		0?	p	g pin 1/2 cm		g pin 1cm		m?	?	pres		pres		pres	P10-7 noted as most likely old (but this contradicts the "reversed" direction, so likely indicates a long interruption of molt)
															n
AMNH 545675	Megacrex inepta	New Guinea, Setekawa River	7_Nov_1912	R	0		0		0		0		1		1 (sab)		1		1		g 3cm	?	g 2/3
															t								n/t
British 1911.12.30.337	Megacrex inepta	New Guinea, Setekawa River	16_Mar_1913	L	0		0		0		0		g pin		pres		pres		pres		pres		pres	P10-7 "rather bad"
British 1911.12.30.337	Megacrex inepta	New Guinea, Setekawa River	16_Mar_1913	R	0?		0?		0?		0?		0?	d	g 1/2	?	pres		pres		pres		pres	stehen = present
Lieden 316	Megacrex inepta	New Guinea, Koembe	7_Mar_1962	L	pres		pres		pres		pres		pres		g 4/5		pres		pres		pres		still g
															n/t								n/t
Lieden 316	Megacrex inepta	New Guinea, Koembe	7_Mar_1962	R	pres		pres		pres		pres		pres		m		pres		pres	?	g 5/6	?	pres
															n/t					?
AMNH 410362	Mentocrex kioloides	Madagascar	10_Jul_1930	L&R	1?		1?		1?	p	still g	p	g -2cm	p	pin 2 cm	p	0?		0?		0?		0?	noted by Stresemanns as a partial synch molter, with ascending tendency
AMNH 410363	Mentocrex kioloides	Madagascar	10_Jul_1930	L	0?	d	"very pretty"		very pretty		very pretty		very pretty		very pretty	p	g -1.5cm	p	g 2/3	p	0?		0?	need feather length to interpret nodality at P3
AMNH 410363	Mentocrex kioloides	Madagascar	No date	R	0?	d	"very pretty"		very pretty		very pretty		very pretty		very pretty	p	g -2cm	p	0?		g 1/2cm		0?	P3 could be new, indicating a nodal feather
																					n
AMNH 545712	Mentocrex kioloides	Madagascar	No date	R	pres	?	g -2cm	p	pin 2 cm	?	pres		pres		pres		pres		pres		g 2cm		pres	"pres" feathers could not be aged, but the two waves suggest a node at P3
																					n/t
British 1931.8.18.1017	Mentocrex kioloides	Madagascar	1_May_1929	L	1		g 2/3		1	p	g 1/3	d	g 3/4	p	g 2cm	p	0		0		0		0
							t
British 1931.8.18.1017	Mentocrex kioloides	Madagascar	1_May_1929	R	1		1		1	p	still g	p	g 2/3	p	pin 2cm	p	0		0		0		0
Brit 1931.8.18.1005	Mentocrex kioloides	Madagascar	26_May_1930	L&R	1		1		1	p	still g	?	still g	p	g 2/3	p	0		0		0		0
Brit 1931.8.18.1007	Mentocrex kioloides	Madagascar	12_Jun_1930	L&R	1		1		1		1		1	p	still g	p	g 2/3	p	g 1/2	p	0		0	suggests no node at P3
Brit 1931.8.18.1010	Mentocrex kioloides	Madagascar	19_Jun_1930	L&R	1		1		1		1		1		1		1		1		1		g 1/2
																						pp	t
	Notes on Mentocrex kioloides from the Stresemanns: Partial synchronous molter with ascending tendency.
Field 11431	Amaurolimnas concolor	No locality	30_Nov_1933	L&R	1		1	p	g 1/2	p	g pin	p	0		0		0		0		0		0
AMNH 176523	Amaurolimnas concolor	Bogota	No date		likely 1		likely 1		likely 1		likely 1		likely 1		likely 1	p	g -1cm	p	0		0		0
USNM 323004	Amaurolimnas castaneiceps	Ecuador	21_Apr_1914	R	pres		pres		pres	?	still g	p	g pin2.5cm	?	pres		g 4/5		pres		pres		pres
																	n/t
USNM 445904	Amaurolimnas castaneiceps	Colombia	2_Jun_1952	R	pres		pres		pres		g 1/2		pres		pres		pres		g -2cm		pres		pres	suggests node at P3
											n/t								n/t
AMNH 185263	Amaurolimnas castaneiceps	Ecuador	12_Mar_1924	R	pres		pres		pres		pres		pres		pres		g 2.5cm		g pin 1/2cm	?	pres		pres
																	n/t
	Notes on Amaurolimnas castaneiceps from the Stresemanns: Ascendent replacement with tendency toward partial synchrony.
British 66.5.8.64	Amaurolimnas fasciata	Ecuador	No date	R	1	pp	still g	p	g -1cm	p	0		0		0		0		0		0		0
					n
Bogota 1928	Amaurolimnas fasciata	Colombia	25_Aug_1947	R	1		1		1		1	p	still g	?	pres	?	0		0		0		0
	Notes on Amaurolimnas fasciata from the Stresemanns: This species "molts slowly ascendent".
Warsaw	Ruifirallus viridis	Guiana	1868	L	1		1		1	p	g 3/4	p	0		0		0		0		0		0
Warsaw	Ruifirallus viridis	Guiana	1868	R	1		1		1	p	still g	?	still g	p	0		0		0		0		0
Warsaw	Ruifirallus viridis	Peru	1872	L	still g	?	still g	p	g 1/4	p	0		0		0		0		0		0		0
	Notes on Ruifirallus viridis from the Stresemanns: Not synchroniously renewed as in Laterallinus melanophaius but, rather, with ascending tendency. That's why we separate the genera. Not a bird with its feet in the water, but lives in overgrown wasteland. Common in overgrown farmland.
AMNH 472187	Neocrex erythrops	Ecuador	15_Apr_1900	L	1	pp	still g	p	g 1/2	p	g 1/3	p	0		0		0		0		0		0
					n
AMNH 472187	Neocrex erythrops	Ecuador	15_Apr_1900	R	still g	pp	g <P10	p	g 2/3	p	0		0		0		0		0		0		0	P7-1 likely old
					n
Berlin 36552	Neocrex erythrops	Ecuador	13_Aug_1900	L	1		1	p	still g	p	g 1/2	p	g 1/3		seems 1	p	g -2cm	p	0		0		0
															n
Berlin 36552	Neocrex erythrops	Ecuador	13_Aug_1900	R	1		1	p	still g	p	g 1/2	d	g -1.5cm	p	0		0		0		0		0
	Notes on Neocrex erythrops from the Stresemanns: Ascendent molt.
British 1922.3.5.395	Micropygia schomburgkii	Roraima, Brazil	1898	L&R	g 4/5	?	g 4/5	p	0		0		0		0		0		0		0		0
AMNH 323267	Micropygia schomburgkii	Venezuela	11_Feb_1938	L&R	1		1		1		1	p	g -1/2cm	p	0		0		0		0		0
British 89.11.20.179	Micropygia schomburgkii	Roraima, Brazil	27_Dec_1883	L	1		1		1		1		1		1	p	g 1/2	p	0		0		0
British 89.11.20.179	Micropygia schomburgkii	Roraima, Brazil	27_Dec_1883	R	1		1		1		1		1	p	still g	p	m	p	0		0		0
AMNH 323261	Micropygia schomburgkii	Venezuela	4_Jan_1938	L&R	1		1		1		1		1		1		1		1	p	g 2/3	pp	0
																							t
	Notes on Micropygia schomburgkii from the Stresemanns: Slowly ascendent replacement.
Berlin 37.1117	Rallina fasciata	Borneo	27_Jul_1935	L	g 1/2	pp	g 1/3	p	g (<P9)	p	0		0		0		0		0		0		0	P10-P8 ascendent, graduated by 1/2 cm
					n
Berlin 37.1117	Rallina fasciata	Borneo	27_Jul_1935	R	2mm < P9		g		1/2 cm < P10	p	0		0		0		0		0		0		0	direction unclear without knowing feather lengths
							n
British 38.4.27.31	Rallina fasciata	Java	No date	L	1	pp	g 4/5	p	g 1/3	p	g pin 1cm	p	m	p	0		0		0		0		0
					n
British 38.4.27.31	Rallina fasciata	Java	No date	R	1	pp	g 5/6	p	g 1/2	p	g pin 1/2cm	p	0		0		0		0		0		0	P9 length inferred by comment that it was a little longer than P9 on left wing
					n
AMNH 545432	Rallina fasciata	Java	May	L	1		1		1		1		1		1	p	g 3/4	?	g 3/4	p	g 3cm	pp	0
																							t
	Notes on Rallina fasciata from the Stresemanns: Ascendent change with tendency to partial synchrony.
Field 621 Conover	Rallina canningi	Andaman Islands	Oct_1897	L&R	g 4/5	?	g 4/5	?	g 4/5	?	g 4/5	?	g 4/5	?	g 4/5	?	g 4/5	?	g 4/5	?	g 4/5	?	g 4/5	all Ps and Ss molting
AMNH 545467	Rallina canningi	Andaman Islands	Oct_1897	L&R	still g	?	still g	?	still g	?	still g	?	still g	?	still g	?	still g	?	still g	?	still g	?	still g
Berlin	Rallina canningi	Andaman Islands	Oct_1897	L&R	1		1		1	p	still g	?	still g	?	still g	?	still g	?	still g	?	still g	?	still g	P7-P1 ascendent graduated lengths, all growing; all Ss growing, no comment on direction in Ss.
	Notes on Rallina canningi from the Stresemanns: Very fast ascendent molt, with tempo increasing to simultaneous for P2 through the secondaries.
British 1908.5.27.15	Rallina tricolor	New Guinea	Aug_1906	L	g 2.5cm	?	g 2.5cm	p	g 2.5cm, <P9	p	0		0		0		0		0		0		0	P8 just shorter than P10; P9 & 10 are the same length.
British 1908.5.27.15	Rallina tricolor	New Guinea	Aug_1906	R	g pin	dd	g 2.5 cm	?	g 2.5 cm	p	0		0		0		0		0		0		0
					t
PANS 137053	Rallina tricolor	New Guinea	15_Jul_1938	L	g 1/2	?	g 1/2	?	g 1/2	p	g short pin	p	0		0		0		0		0		0	same lengths, so no sequence
PANS 137053	Rallina tricolor	New Guinea	15_Jul_1938	R	g 1/2	?	g 1/2	?	g 1/2	p	0		0		0		0		0		0		0	same lengths, so no sequence
PANS 140582	Rallina tricolor	Waigeo	26_Dec_1938	L&R	g 2/3	?	g 2/3	?	g 2/3		No data		0		0		0		0		0		0	almost exactly same lengths
AMNH 545473	Rallina tricolor	No locality	2_Jul_1899	L	1	pp	still g	?	still g	?	still g	?	still g		g 1/2cm<P6		g 2/3		g pin 1cm		m		pres	P9-P6 in "correct" ascendent sequence
					n
AMNH 545473	Rallina tricolor	No locality	2_Jul_1899	R	1 sab	pp	still g	?	still g	?	still g	?	still g	?	still g	?	still g	p	g 3cm	?	pres		pres	P9-P6 in "correct" ascendent sequence; no direction indicated for P5 & P4
					n
AMNH 338643	Rallina tricolor	New Guinea	29_Apr_1939	L	1		1		1		1		1		1	p	g 1/2	p	g bud	p	0		0
AMNH 338643	Rallina tricolor	New Guinea	29_Apr_1939	R	1		1		1		1		1	p	g 2/3	p	g 1/2	p	g 2.5cm	p	g bud	pp	0
																							t
	Notes on Rallina tricolor from the Stresemanns: Molt initiates with the three to five distal Ps lost simultaneously or nearly so. Once these outer Ps are usable again, then the proximal Ps are replaced rapidly in ascendent sequence. Unlikely that it is completely unable to fly while molting.
Berlin 30.1833	Rallicula forbesi	Papua New Guinea	16_Feb_1929	L	pres		still g		pres	?	g -1.5cm	p	g 1/2	?	pres		pres		pres		pres		g 1/2
							n/t																n/t
Berlin 30.1826	Rallicula forbesi	Papua New Guinea	20_Feb_1929	L	pres	?	1 sab	?	1 sab	p	still g	p	g 4/5	p	g 1/4	p	0		0		0		0
Berlin 30.1826	Rallicula forbesi	Papua New Guinea	20_Feb_1929	R	1?		1?	p	1 sab	?	1 sab	p	g 3/4	p	g 1/2	p	g 1/4	p	m	p	0		0
AMNH 704738	Rallicula forbesi	Papua New Guinea	17_Jun_1950	L&R	1 sab	?	1 sab	p	g -1.5cm	p	g bud	p	0		0		0		0		0		0
AMNH 704727	Rallicula forbesi	Papua New Guinea	19_May_1950	R	1		1		1		1		1		1	p	still g	p	g 1/2	p	g bud	pp	0
																							t
AMNH 704751	Rallicula forbesi	Papua New Guinea	18_Jul_1950	L	0?		0?		5 -2cm		0?		0?	p	1	p	still g	p	g 1/2	?	g 1/2		No data
									n
AMNH 704751	Rallicula forbesi	Papua New Guinea	18_Jul_1950	R	0?		0?		0?		0?		g 2cm bud	d	g 2.5cm	d	g -2cm	p	g -2.5cm	p	g 2.5cm	pp	0?
													t										t
AMNH 704744	Rallicula forbesi	Papua New Guinea	21_Jul_1950	L	g 3cm bud	dd	1		1		1		1		1		1	p	still g	p	g 2/3	pp	m
					t																		t
AMNH 704744	Rallicula forbesi	Papua New Guinea	21_Jul_1950	R	g 1cm bud	dd	1		1		1		1		1		1		1		1	pp	g 2/3
					t																		t
Berlin 30.1847	Rallicula forbesi	Papua New Guinea	6_Feb_1929	L	g 1.5cm bud	dd	g 1/2	p	0		0		0		1 sab		0		0		0		0	P4-P1 likely old; P8-6 listed as old without qualification.
					t		n								n
Berlin 30.1854	Rallicula forbesi	Papua New Guinea	22_Feb_1929	L			g 3cm bud														g 1/3			blanks = no data listed
Berlin 30.1854	Rallicula forbesi	Papua New Guinea	22_Feb_1929	R			g 1cm bud						g 1.5cm bud											blanks = no data listed
Berlin 30.1850	Rallicula forbesi	Papua New Guinea	7_Feb_1929	R	still g		1?		1?		g 1/4		0/1		0/1		0/1		g 5/6		0/1		0/1	0/1 = fraglich = questionable
					t	dd				p		p							n/t
	Notes on Rallicula forbesi from the Stresemanns: Common in moist mountanious forest of New Guinea; took data on more than 10 specimens and got a clear idea of how it molts. Ps with strong tendency to fast ascendent molt with irregularities common. P10 does not always drop first. The 9 Ss are dropped in irregular order while the primaries are molting (S sequence given for Berlin 30.1826 and 30.183…
